# Supplementary material
Source: PubMed Central journal article supplement (PMC7585609)

# Supplementary Figure 1

**A**

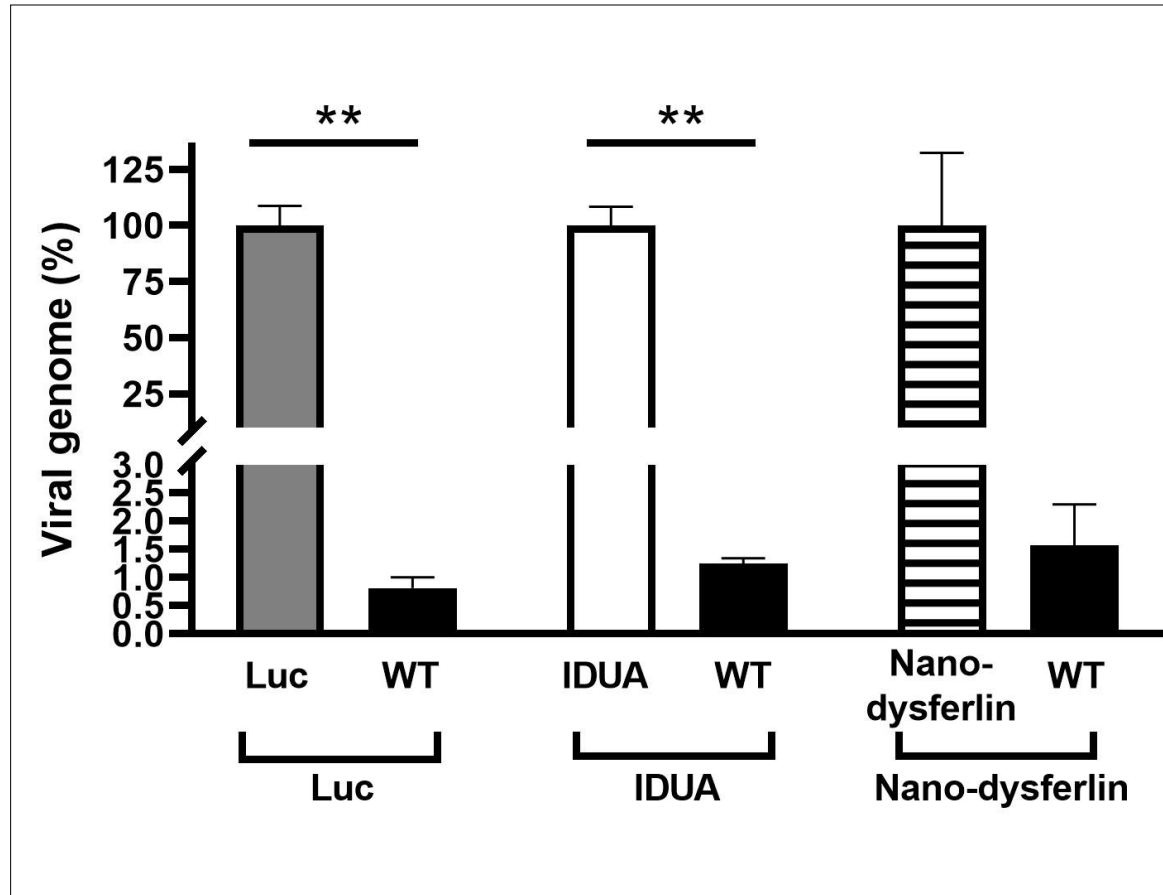

**B**

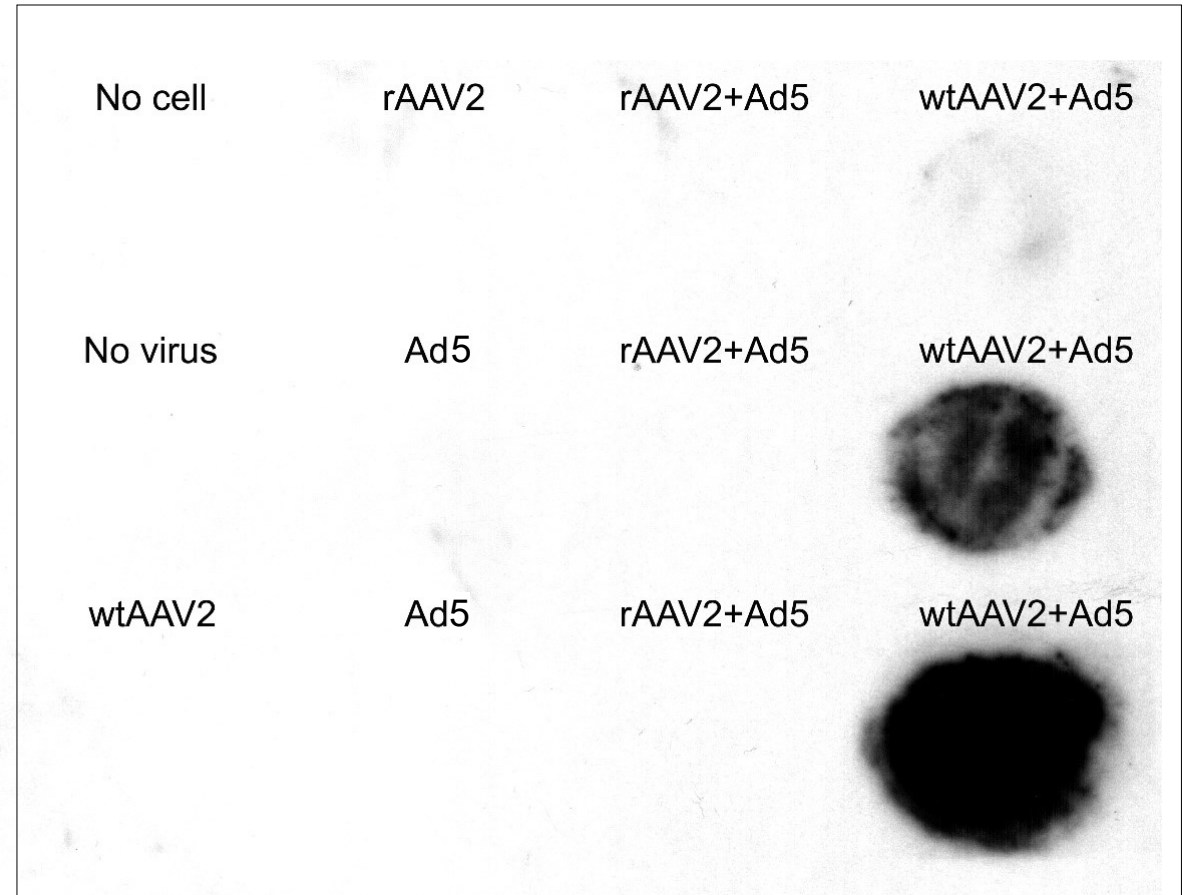

Supplement: Supp_FigS1.pdf [file Supp_FigS1.pdf]

Supplementary Figure 2

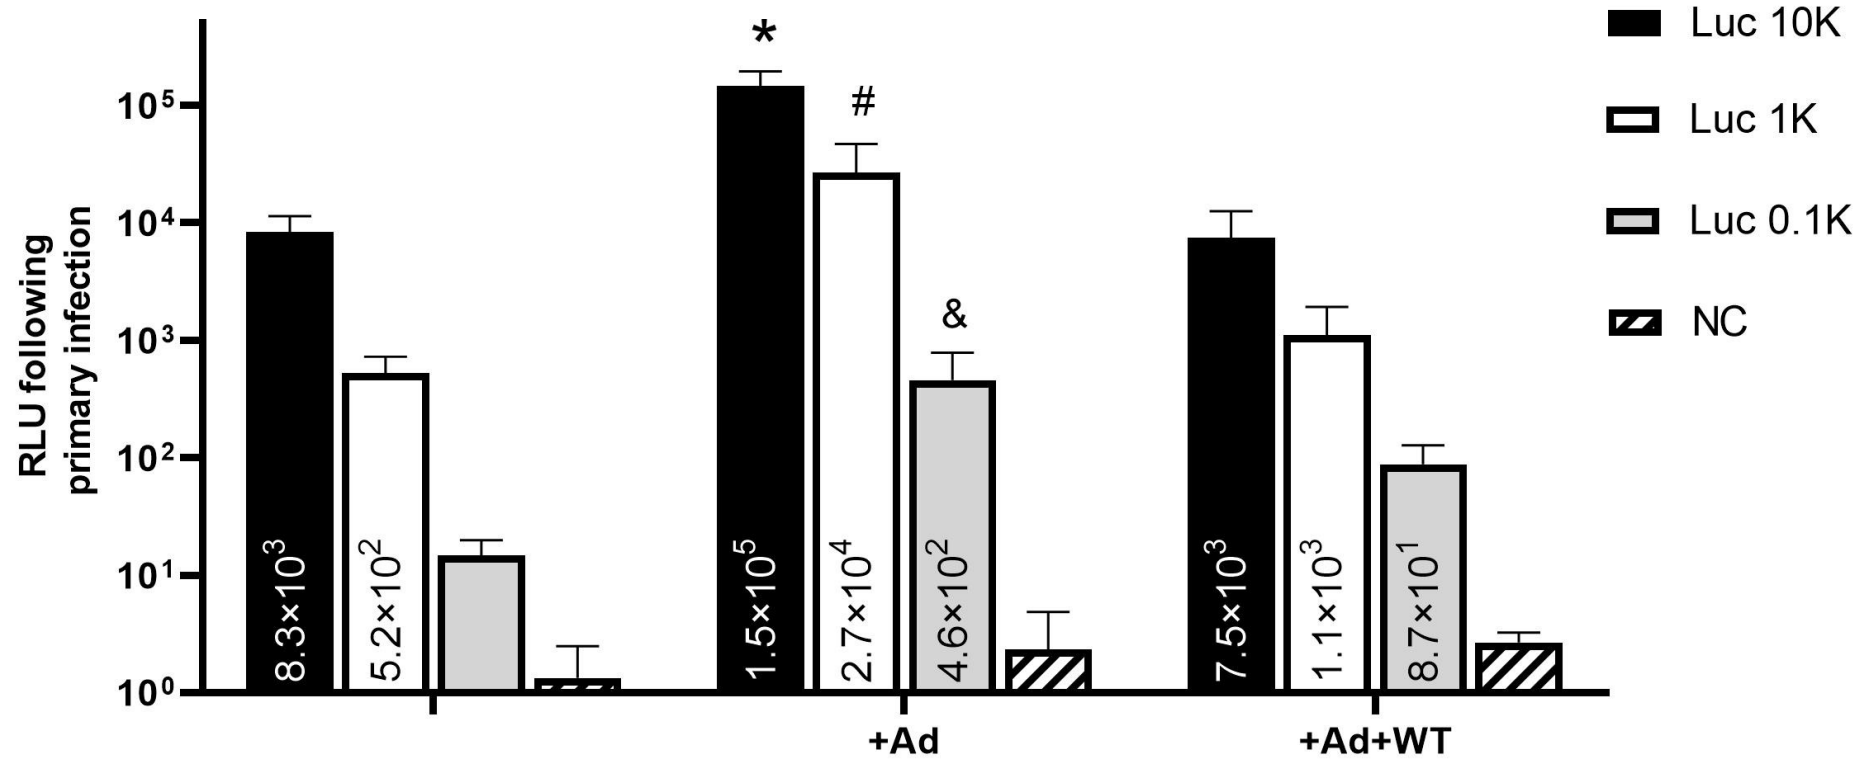

Supplement: Supp_FigS2.pdf [file Supp_FigS2.pdf]

Supplementary Figure 3

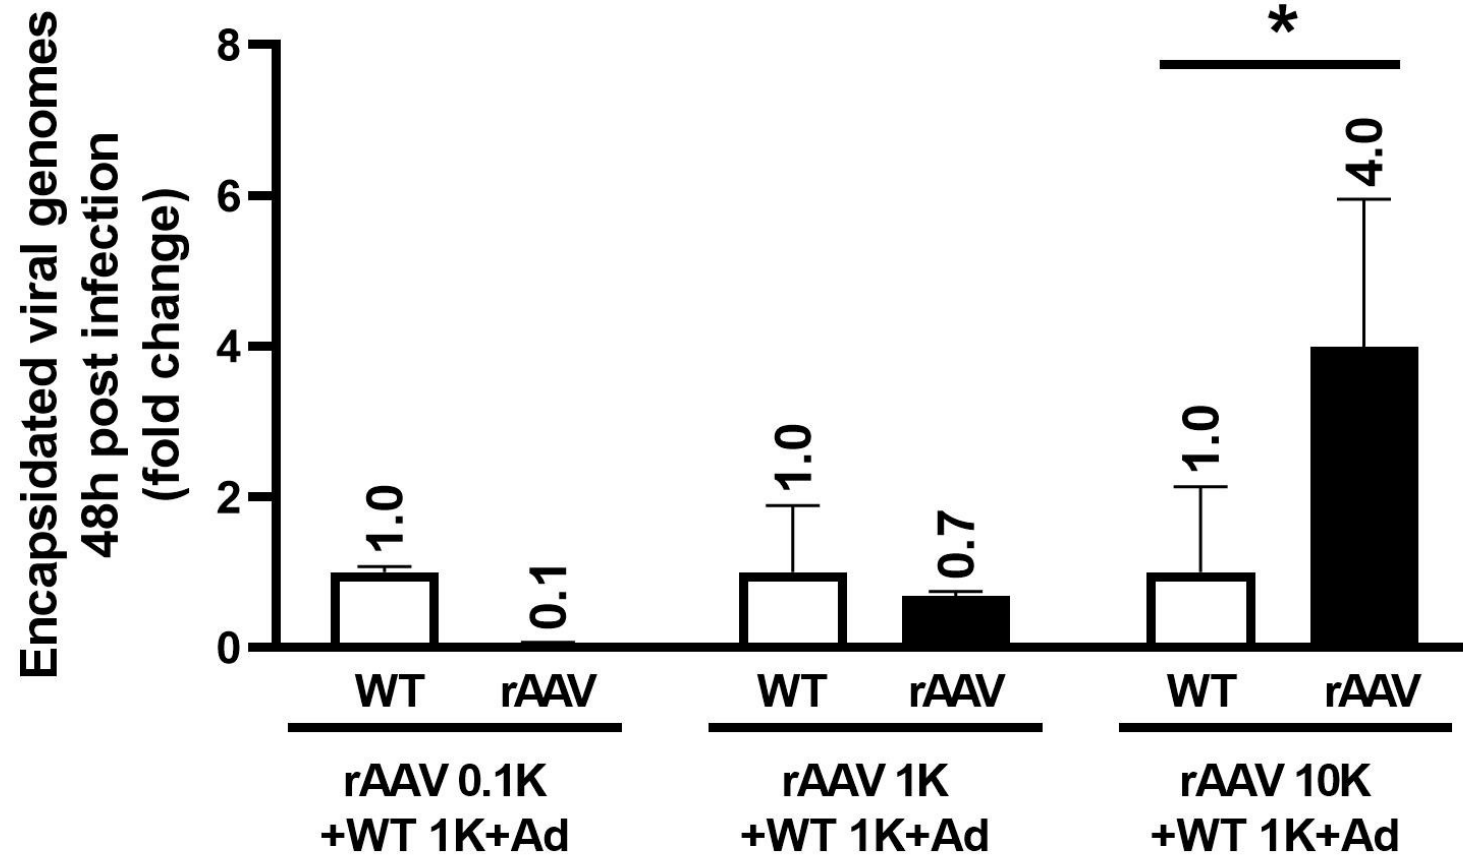

Supplement: Supp_FigS3.pdf [file Supp_FigS3.pdf]

Supplementary Figure 4

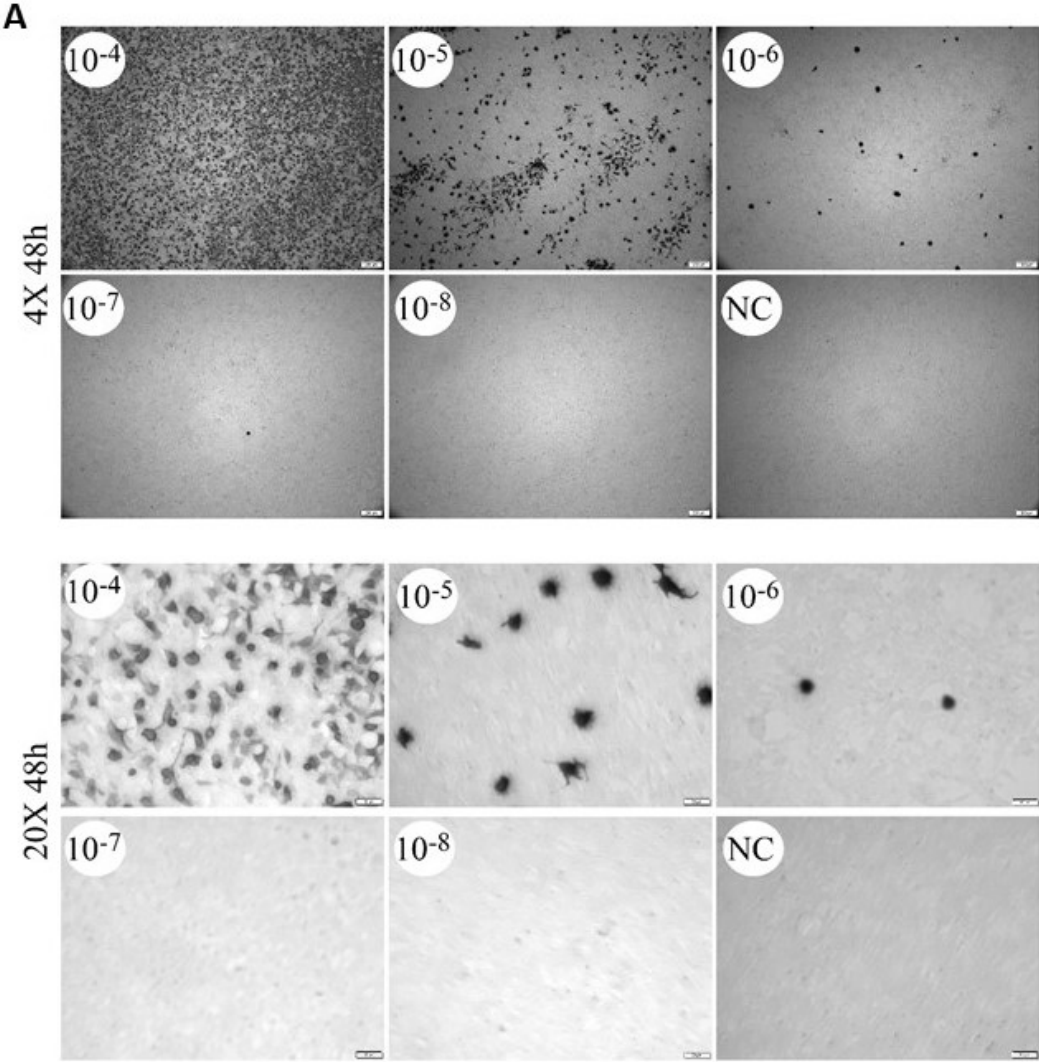

Supplement: Supp_FigS4.pdf [file Supp_FigS4.pdf]

## Supplementary Figure 5

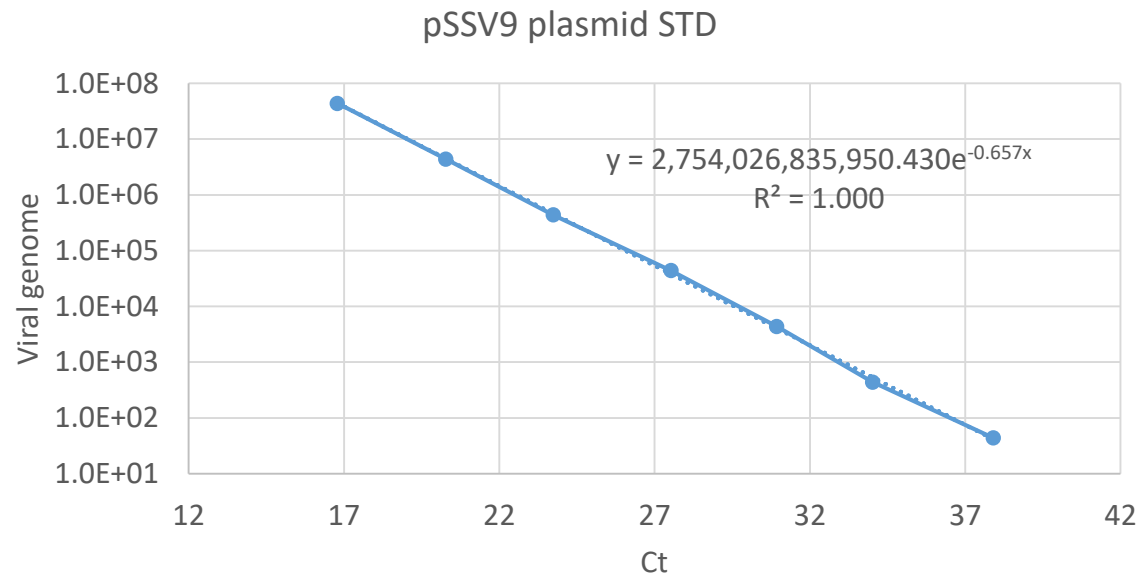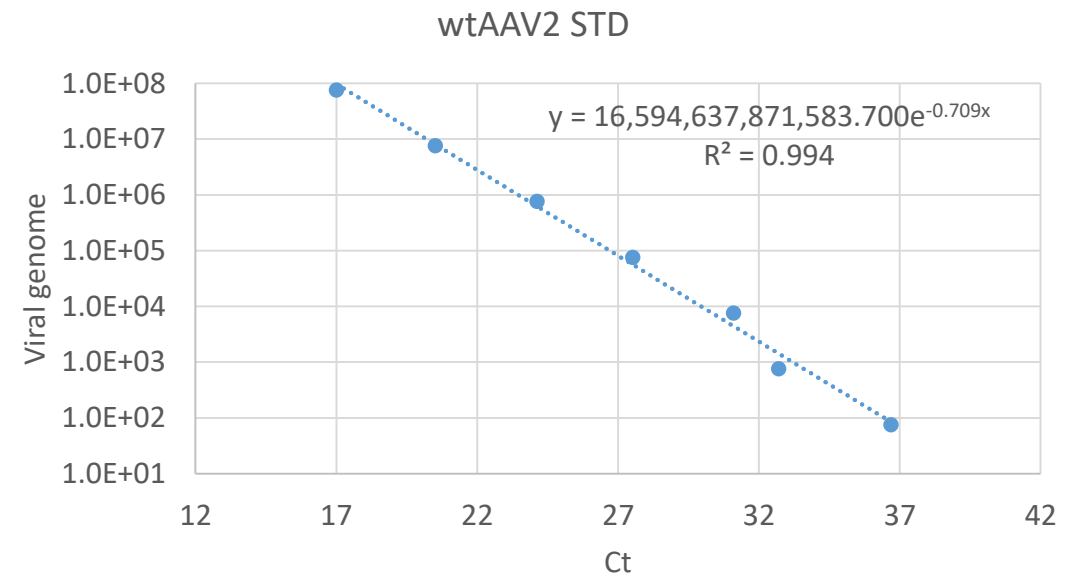

Supplement: Supp_FigS5.pdf [file Supp_FigS5.pdf]
